# Supplementary material for: Effect of 2 Clinical Decision Support Strategies on Chronic Kidney Disease Outcomes in Primary Care: A Cluster Randomized Trial
Source: PubMed Central journal article supplement (PMC6324427; doi:10.1001/jamanetworkopen.2018.3377), 2018-10-26

## Supplementary Online Content

Carroll JK, Pulver G, Dickinson LM, et al. Effect of 2 clinical decision support strategies on chronic kidney disease outcomes in primary care: a cluster randomized trial. *JAMA Netw Open*. 2018;1(6):e183377. doi:10.1001/jamanetworkopen.2018.3377

**eTable 1.** TRANSLATE Elements as Implemented

**eReferences**

**eTable 2.** List of EHRs

**eTable 3.** Intent to Treat Analysis Of Stage 3 and Stage 4 Patients From the Final Cohort Of Practices. Systolic BP Change Over Time: Intervention vs Randomized Controls

**eTable 4.** Other Secondary Outcomes: Intervention vs Randomized Controls

**eFigure 1.** Data Sources for the Creation of the Point of Care Reminder

**eFigure 2.** Map of Practice Locations

This supplementary material has been provided by the authors to give readers additional information about their work.

**eTable 1. TRANSLATE Elements as Implemented**

| TRANSLATE Element                                | Operationalized As                                                                                                                                                                                                                                                                                                                                                                                                                                                                                                                   | CDS | CDS+PF |
|--------------------------------------------------|--------------------------------------------------------------------------------------------------------------------------------------------------------------------------------------------------------------------------------------------------------------------------------------------------------------------------------------------------------------------------------------------------------------------------------------------------------------------------------------------------------------------------------------|-----|--------|
| Set your Target                                  | Common targets for chronic kidney disease (CKD) detection and treatment were created and communicated via a CKD tracking tool that was provided to all sites. The key performance measures and their targets were control of blood pressure, glucose, low density lipoprotein (LDL), use of angiotensin converting enzyme inhibitor (ACEi)/ angiotensin receptor blocker (ARB), referral to a nephrologist, smoking cessation and avoidance of nonsteroidal anti-inflammatory drugs (NSAID) or Cyclooxygenase-2 (Cox-2) medications. | ✓   | ✓      |
| Use point of care Reminder systems               | A point-of-care decision support tool prompted users to implement the key evidence-based recommendations that were the focus of the study.                                                                                                                                                                                                                                                                                                                                                                                           | ✓   | ✓      |
| Get Administrative buy-in                        | Study personnel obtained consent from each practice and worked with all physicians in the practices.                                                                                                                                                                                                                                                                                                                                                                                                                                 | ✓   | ✓      |
| Network Information systems utilizing registries | A system-level registry reports across all practices. The registry was provided through practices' electronic health records (EHRs) and interaction with DARTNet and CINA, companies that collect, standardize, and synthesize data from multiple EHR vendors.                                                                                                                                                                                                                                                                       | ✓   | ✓      |
| Site coordination                                | A site coordinator at each practice assembled a quality improvement team that met monthly to review performance data regarding CKD. The site coordinator created local accountability for completion of the study, and also worked with the clinicians and practice staff to implement workflow changes such as pre-visit planning, standing orders, and patient education materials to improve disease management.                                                                                                                  |     | ✓      |
| Local Physician Champion                         | A clinician leader in each practice supported the site coordinator and the quality improvement team. This clinician was in contact with an academic mentor regarding clinical questions about CKD and participated in learning collaboratives with the site coordinator.                                                                                                                                                                                                                                                             |     | ✓      |

| TRANSLATE Element  | Operationalized As                                                                                                                                                                                                                                                                                                                                                                                                                                                                                                                                                                                                                                                                                                                                                                                                                                                                                                                                                                                                             | CDS | CDS+PF |
|--------------------|--------------------------------------------------------------------------------------------------------------------------------------------------------------------------------------------------------------------------------------------------------------------------------------------------------------------------------------------------------------------------------------------------------------------------------------------------------------------------------------------------------------------------------------------------------------------------------------------------------------------------------------------------------------------------------------------------------------------------------------------------------------------------------------------------------------------------------------------------------------------------------------------------------------------------------------------------------------------------------------------------------------------------------|-----|--------|
| Audit and feedback | Audit and Feedback reports were generated at the practice, individual provider, and patient level through CINA regarding the seven performance measures (blood pressure, hemoglobin A1c (HbA1c), LDL, use of ACE/ARB, referral to a nephrologist, smoking cessation and avoidance of NSAID or Cox-2). Reports were reviewed quarterly with the practice facilitator by videoconference.                                                                                                                                                                                                                                                                                                                                                                                                                                                                                                                                                                                                                                        |     | ✓      |
| Team approach      | The local physician champion, site coordinator and nursing, front office, and administrative staff met monthly to review progress of the CKD project. Workflow changes were recommended and tested.                                                                                                                                                                                                                                                                                                                                                                                                                                                                                                                                                                                                                                                                                                                                                                                                                            |     | ✓      |
| Education          | An Educational program using academic detailing, <sup>1</sup> practice facilitation, <sup>2</sup> and video conferencing was implemented to support the practices' efforts. All practices were assigned an academic practice mentor (Drs. Fox or Vassalotti). The mentors were available to the office physician champion and practice coordinator to answer questions. The academic mentors reviewed the practice's data and participated in quarterly videoconferences with either the study coordinator or the lead clinician to review progress on the project. The practice facilitators were available remotely and completed facilitation training. They provided support to build the capacity of the practice to continuously evaluate and implement sustained improvements in evidence-based CKD care. Facilitators also participated in regular study team meetings, data collection, and communication with participating sites. Additional description of the facilitators' role has been published. <sup>3</sup> |     | ✓      |

✓ = implemented in this study group

CDS = computerized decision support

CDS+PF = computerized decision support plus practice facilitation

## References

1. Soumerai SB, Avorn J. Principles of educational outreach ('academic detailing') to improve clinical decision making. *JAMA : the journal of the American Medical Association*. 1990;263(4):549-556.
2. Nagykaldis Z, Mold JW, Robinson A, Niebauer L, Ford A. Practice Facilitators and Practice-based Research Networks. *Journal of the American Board of Family Medicine: JABFM*. 2006;19(5):506-510.
3. Fox CH, Vest BM, Kahn LS, et al. Improving evidence-based primary care for chronic kidney disease: study protocol for a cluster randomized control trial for translating evidence into practice (TRANSLATE CKD). *Implementation science : IS*. 2013;8:88.

eTable 2. List of EHRs

| <b>EHR Name</b> | <b>Count</b> |
|-----------------|--------------|
| EMDs            | 16           |
| i2i             | 8            |
| Allscripts      | 5            |
| Medinformatix   | 1            |
| Centricity      | 1            |
| Medent          | 6            |
| HealthMetrics   | 5            |
| <b>Total</b>    | <b>42</b>    |

**eTable 3. Intent to Treat analysis of stage 3 and stage 4 patients from the final cohort of practices. Systolic BP change over time: Intervention vs randomized controls**

| Systolic BP<br>Variable                                            | Intent to Treat         |         | Propensity Adjusted     |         |
|--------------------------------------------------------------------|-------------------------|---------|-------------------------|---------|
|                                                                    | Adj models<br>Coef (SE) | p-value | Adj models<br>Coef (SE) | p-value |
| Intercept                                                          | 128.65 (1.76)           | ----    | 130.09 (1.94)           | ----    |
| Age                                                                | .11 (.01)               | <.001   | .11 (.01)               | <.001   |
| Gender<br>Female (ref)                                             |                         |         |                         |         |
| Male                                                               | -1.21 (.26)             | <.001   | -1.25 (.26)             | <.001   |
| Current smoker                                                     | -.53 (.47)              | .26     | -.56 (.47)              | .23     |
| Diabetes                                                           | 1.07 (.38)              | .005    | 1.03 (.38)              | .007    |
| ACEi/ARB                                                           | 2.91 (.27)              | <.001   | 2.63 (.32)              | <.001   |
| Stage 4                                                            | .77 (.31)               | .01     | .78 (.31)               | .01     |
| CKD diagnosis                                                      | -.17 (.39)              | .66     | -.75 (.51)              | .14     |
| NSAIDs                                                             | -.20 (.29)              | .49     | -.25 (.29)              | .39     |
| LDL<100                                                            | -1.59 (.26)             | <.001   | -1.56 (.26)             | <.001   |
| HbA1c<br>Less than 7 (ref)                                         | ----                    |         | ----                    |         |
| 7 or greater                                                       | 1.94 (.37)              | <.001   | 1.97 (.37)              | <.001   |
| Not done                                                           | -.06 (.37)              | .87     | -.09 (.37)              | .81     |
| Intervention vs controls<br>(at baseline)                          | 2.51 (2.05)             | .22     | 2.82 (2.05)             | .17     |
| Systolic blood pressure<br>change per year in<br>controls (slope)  | .29 (.30)               | .34     | .29 (.30)               | .33     |
| Difference in blood<br>pressure slope for<br>intervention patients | -.10 (.35)              | .77     | -.10 (.35)              | .77     |

ACEi = angiotensin converting enzyme inhibitor

ARB = angiotensin receptor blocker

CKD = Chronic Kidney Disease

HbA1c = hemoglobin A1c

LDL = low density lipoprotein

NSAID = nonsteroidal anti-inflammatory drugs

SE = standard error

**eTable 4. Other secondary outcomes: Intervention vs randomized controls**

| Variable                   | Use of NSAIDs<br>N=6699 |             |                         |             | Use of ACEi/ARB<br>N=6699 |             |                         |         | CKD diagnosis* N=5331   |             |                         |             |
|----------------------------|-------------------------|-------------|-------------------------|-------------|---------------------------|-------------|-------------------------|---------|-------------------------|-------------|-------------------------|-------------|
|                            | Intent to Treat         |             | Propensity Adjusted     |             | Intent to Treat           |             | Propensity Adjusted     |         | Intent to Treat         |             | Propensity Adjusted     |             |
|                            | Adj models<br>Coef (SE) | p-<br>value | Adj models<br>Coef (SE) | p-<br>value | Adj models<br>Coef (SE)   | p-<br>value | Adj models<br>Coef (SE) | p-value | Adj models<br>Coef (SE) | p-<br>value | Adj models<br>Coef (SE) | p-<br>value |
| Intercept                  | -1.64(.57)              | ----        | -1.30 (.66)             | ----        | 0.19 (.55)                | ---         | .62 (.63)               | ----    | -1.09 (.67)             | ---         | -.47 (.60)              | ----        |
| Age                        | -.004 (.006)            | .50         | -.004 (.006)            | .51         | .002 (.007)               | .80         | .002 (.007)             | .73     | -.005 (.01)             | .59         | -.005 (.01)             | .64         |
| Gender                     |                         |             |                         |             |                           |             |                         |         |                         |             |                         |             |
| Female (ref)               | ----                    |             | ----                    |             | ---                       |             |                         |         | ---                     |             | ---                     |             |
| Male                       | -.21 (.10)              | .03         | -.21 (.09)              | .02         | -.101(.03)                | <.001       | -.13 (.02)              | <.001   | .41 (.22)               | .06         | .40 (.23)               | .08         |
| Current smoker             | -.16 (.05)              | .002        | -.17 (.05)              | <.001       | -.07 (.08)                | .38         | -.11 (.06)              | .08     | -.04 (.06)              | .46         | -.08 (.07)              | .26         |
| Diabetes                   | -.21(.06)               | <.001       | -.23 (.06)              | <.001       | .45 (.12)                 | <.001       | .41 (.12)               | 001<.   | .37 (.14)               | .009        | .33 (.12)               | .008        |
| Stage 4                    | -.49 (.10)              | <.001       | -.49 (.11)              | <.001       | -.15(.07)                 | .04         | -.17 (.06)              | .003    | 1.01 (.21)              | <.001       | 1.02 (.21)              | <.001       |
| CKD dx at baseline         | -.47 (.20)              | .02         | -.63 (.27)              | .02         | .27 (.21)                 | .20         | .24 (.22)               | .28     | ----                    | ----        | ----                    | ----        |
| BP <sub>≤</sub> 140/90     | .18 (.11)               | .08         | .19 (.11)               | .07         | -.02 (.13)                | .85         | -.01 (.13)              | .94     | -.13 (.12)              | .29         | -.11 (.12)              | .35         |
| LDL<100                    | -.08(.05)               | .12         | -.08 (.05)              | .14         | 0.05(.05)                 | .29         | .05 (.05)               | .28     | .16 (.08)               | .07         | .16 (.08)               | .03         |
| HbA1c less than 7 (ref)    | ---                     | ---         | ---                     |             | ---                       | ---         | ---                     |         | ---                     | ---         | ----                    | ----        |
| 7 or greater               | -.13 (.12)              | .27         | -.13 (.12)              | .28         | .19 (.05)                 | <.001       | .19 (.05)               | <.001   | .24 (.06)               | <.001       | .25 (.06)               | <.001       |
| Not done                   | -.19 (.09)              | .04         | -.19 (.09)              | .03         | -.12 (.11)                | .26         | -.12 (.11)              | .26     | -.14 (.15)              | .35         | -.15 (.14)              | .29         |
| Intervention (vs controls) | 0.42 (.34)              | .22         | .51 (.38)               | .18         | -.52(.47)                 | .27         | -.30 (.53)              | .57     | -.04 (.06)              | .46         | -.07 (.29)              | .81         |

\*among those who did not have a CKD dx at baseline

CKD = Chronic Kidney Disease

HbA1c = hemoglobin A1c

NSAID = nonsteroidal anti-inflammatory drugs

ACEi = angiotensin converting enzyme inhibitor

ARB = angiotensin receptor blocker





**eFigure 1. Data sources for the creation of the point of care reminder**

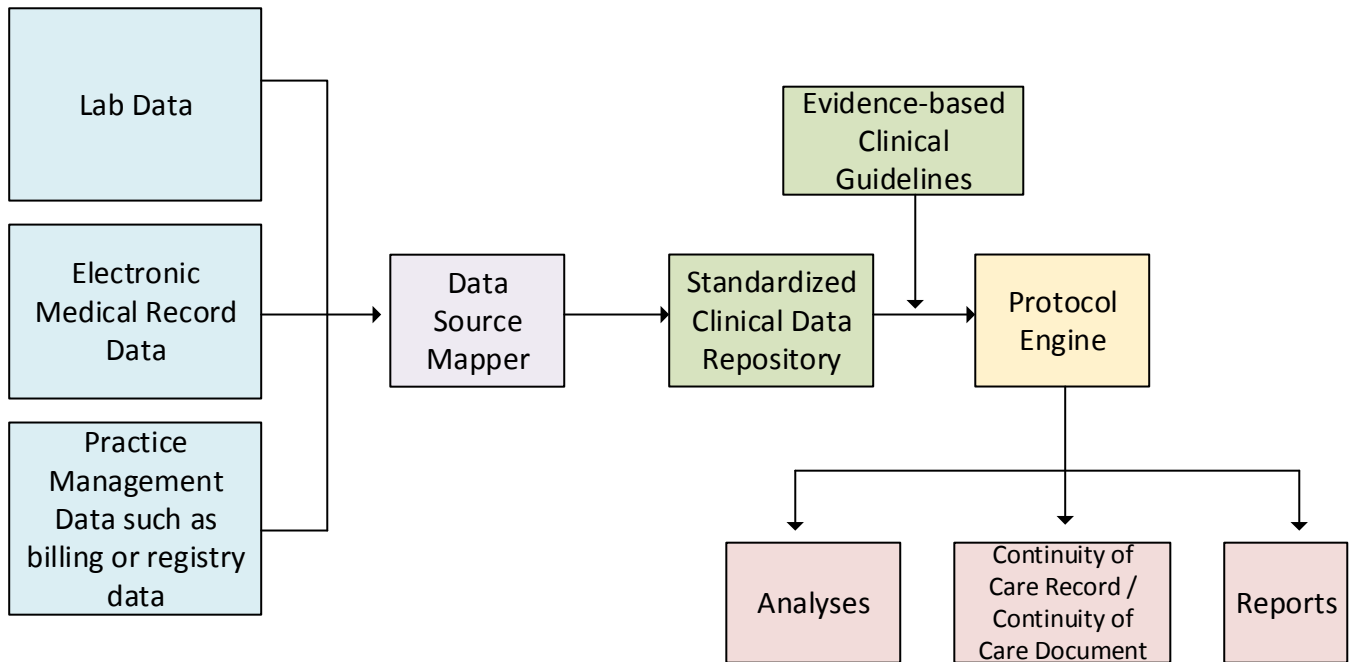

eFigure 2: Map of practice locations

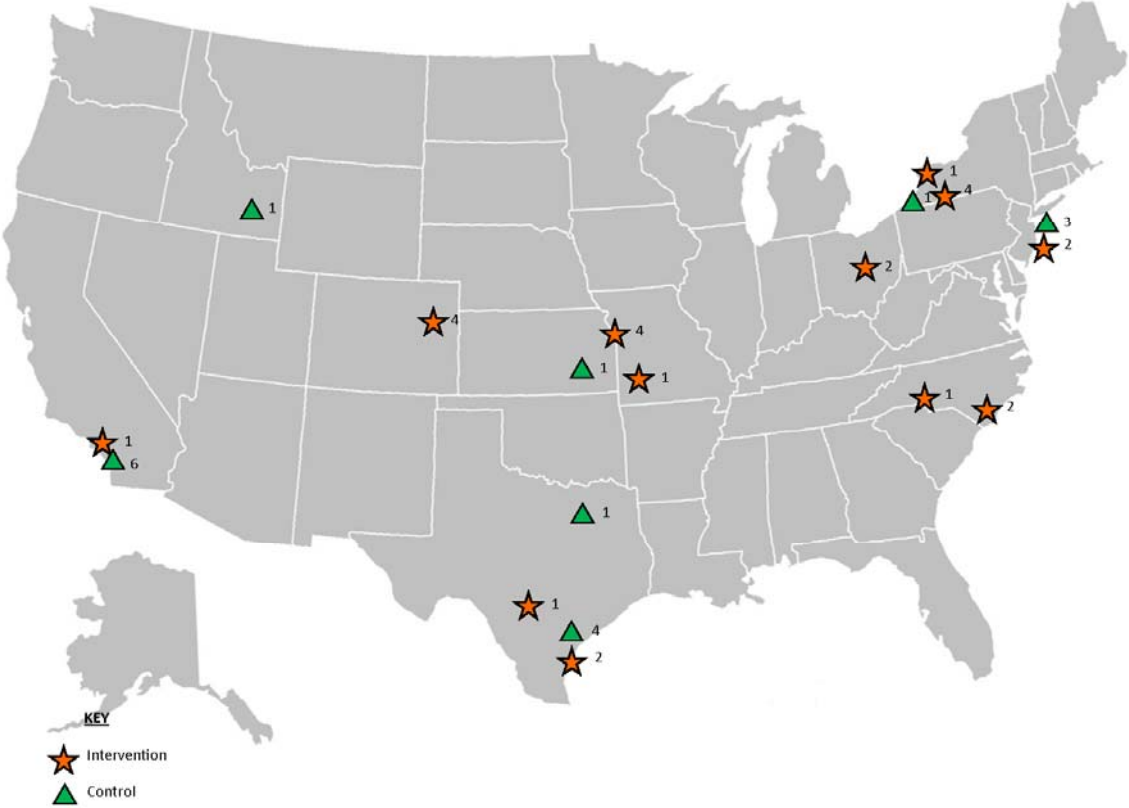

Supplement: jamanetwopen-1-e183377-s002.pdf [file jamanetwopen-1-e183377-s002.pdf]
