# Supplementary material for: Effect of 2 Clinical Decision Support Strategies on Chronic Kidney Disease Outcomes in Primary Care: A Cluster Randomized Trial
Source: PubMed Central journal article supplement (PMC6324427; doi:10.1001/jamanetworkopen.2018.3377), 2018-10-26
Supplement: jamanetwopen-1-e183377-s001.pdf [file jamanetwopen-1-e183377-s001.pdf]

## 1 DATA ANALYSIS

### 3 General Approaches

4 Initially, descriptive statistics (mean, SD, proportions) will be computed for baseline patient  
5 and practice characteristics. In addition, chi-squares and t-tests will be used to determine  
6 whether there are differences between: (1) patients in practices randomized to different  
7 intervention conditions, and (2) dropouts and non-dropouts. Practices randomized to the two  
8 intervention groups (TRANSLATE, CDS only) will be compared on patient sociodemographic  
9 and clinical variables; these variables will be included as covariates in subsequent analyses if  
10 they differ between groups, are associated with outcomes, or are associated with dropout. In  
11 general, we will employ methods that utilize all available data, assuming ignorable missingness  
12 (MCAR or MAR).<sup>54-59</sup> For primary outcome variables that are continuous (or ordinal) we will  
13 explore whether these outcome variables are normally distributed prior to analysis. In the event  
14 that normality assumptions are not met, we will use transformations to normalize distributions,  
15 ordinal or Poisson regression where appropriate, or techniques using the appropriate link  
16 function (e.g. logit link for dichotomized measures).<sup>60</sup> We will employ intent to treat analyses  
17 using general (generalized) linear mixed model approaches (GLMMs) to incorporate data  
18 structures that are both hierarchical and longitudinal.<sup>61</sup> For time to event outcomes (e.g. death,  
19 ESRD), Cox proportional hazards models will be used to analyze the data. All hypothesis tests  
20 will be two-sided with  $\alpha=.05$  or p values reported). Goodness of fit statistics (e.g. AIC,  
21 deviance,  $-2 \log$  likelihood and change in  $-2LL$  for nested models) and model fitting diagnostics  
22 to assess for influential points, outliers, overdispersion and heteroscedasticity will be used to  
23 evaluate alternative model specifications.<sup>60</sup> Covariates will be screened initially in bivariate  
24 analyses and included in multivariate analysis if they are related to the outcome at  $p<.2$ , differ  
25 between treatment arms, or are associated with dropout.

26 Because all data will be gathered from the practice EHRs, availability of data will not be  
27 dependent on participation in interventions, allowing robust estimates of effectiveness of  
28 interventions among those for whom they are intended as well as sub-analyses among those  
29 who participate. All statistical analyses will be performed using SAS version 9.2 (SAS Institute  
30 Inc., Cary, N.C.).

31  
32 **Specific Aim 1:** Conduct a group randomized controlled trial of point-of-care computer  
33 decision support plus the full TRANSLATE mode of practice change, versus computer decision  
34 support alone in promoting evidence-based care in primary care practices for all patients with an  
35 eGFR <60 and \_\_\_\_\_ > 15 ml/min/1.73m<sup>2</sup> (stage 3 and 4) confirmed with repeat testing  
36 over three or more months.

### 39 Power and Sample Size

40 With 20 practices per arm and a minimum of 200 patients per practice there will be a minimum  
41 of 4000 patients per arm. A sample size of 4000 per arm will provide >80% power to detect a  
42 .17 effect size difference between two arms at a single time point if the ICC is 3%. This effect  
43 size was assumed based on previous results from the diabetes TRANSLATE study.[2]In terms  
44 of change over time, a sample size of 4000 will provide >80% power to detect a small linear  
45 trend effect (increasing from 0 at baseline to .2SD at final follow up) with four observations per  
46 person and an ICC of 3%, with a random effects structure with random intercept and random  
47 slope and 5% attrition over time.<sup>62</sup> If the ICC is higher (e.g. 10%) and attrition is higher (e.g.  
48 20%) we will still have power to detect a medium linear trend effect (increasing from 0 at  
49 baseline up to .5SD difference at final follow up) with four observations per person.<sup>62</sup>

51 **Patient Cohort for SA1 and SA2.** Patients will be identified as eligible for this cohort if they  
 52 meet criteria for stage three CKD at baseline; new patients will be added to the cohort up to 24  
 53 months after initiation of the group-randomized trial to allow for potential minimum follow-up of  
 54 12 months. In the analyses described below, time will be coded individually for each patient,  
 55 depending on when the patient is eligible to become part of the cohort. Diagnosis of stage 3  
 56 CKD requires two eGFRs<60 ml/min/1.73m<sup>2</sup> at least three months apart. For patients in the  
 57 initial cohort time 0 is defined as the date of randomization; for patients added to the cohort time  
 58 0 is defined at date of the second eGFR<60. Therefore, baseline (time 0) will be defined as the  
 59 date of randomization for patients who meet criteria for stage 3 CKD prior to study initiation or  
 60 the *second* eGFR<60 with another eGFR <60 occurring a minimum of 3 months prior and no  
 61 intervening eGFR>60 for patients who meet criteria for stage three CKD from baseline to 24  
 62 months after baseline. The rationale for choosing the latter definition for baseline for patients  
 63 entering the cohort is based on the initial date when the physician would be expected to confirm  
 64 the presence of stage 3 CKD and begin active clinical management to delay progression.

65 **Hypothesis 1.1:** CDS practices using the TRANSLATE model will provide a greater  
 66 degree of evidence-based guideline-concordant care for CKD than CDS only practices.  
 67

68 The primary outcome for this analysis will be a patient-level score based on the percentage of  
 69 goals achieved. Each goal will be assessed using EHR data for the *previous year (or part of the*  
 70 *year in which the patient is eligible)* at baseline, 12 months, 24 months, and 36 months, as  
 71 described in the table below. A composite guideline concordance score (GCS) will be created  
 72 as the proportion of the number of applicable goals met. Secondary analyses will examine each  
 73 outcome individually using all available data and continuous measures (e.g. systolic BP, HbA1c,  
 74 LDL) or dichotomous measures (ACE/ARB, referral, smoking, NSAIDS).  
 75

76 **TABLE 1: Evidence-Based Outcome Measures**  
 77

| Treatment Recommendation         | Goal   | Measurement                                                                                                   |
|----------------------------------|--------|---------------------------------------------------------------------------------------------------------------|
| Control blood pressure           | 130/80 | Means of last three systolic and diastolic BP; will be based on last one or two if fewer than three available |
| Control HbA1C                    | <7.0   | Last HbA1c;                                                                                                   |
| Control LDL                      | <100   | Mean of last two LDL; last LDL if only one is available                                                       |
| Use ACE/ARB                      |        | Documentation in EHR/pharmacy of prescription; yes/no for each time period                                    |
| Refer to Nephrologist (GFR < 30) |        | Referral documented, if applicable                                                                            |
| Eliminate smoking                |        | Yes/no for each time period                                                                                   |
| Eliminate NSAID/Cox-2 use        |        | Yes/no for each time period                                                                                   |

78  
 79 The structure of the data is hierarchical (patients nested within practices) and longitudinal  
 80 (repeated assessments on patients at baseline, 12, 24, and 36 months).

81 **Level 1 model.** Repeated measures within each patient will be modeled as a time trend  
 82 (linear growth curve shown below; quadratic trend will be tested) model. Time will be coded as  
 83 days since baseline,  
 84

85 converted to months to aid interpretability. The guideline concordance score for patient i  
 86 measured at time t in practice j is  $Y_{tj}$

87  $Y_{tij} = \pi_{0ij} + \pi_{1ij}(\text{time})_{tij} + \varepsilon_{tij}$   
88 where  $\pi_{0ij}$  is the individual status at time 0,  $\pi_{1ij}$  is the linear growth rate for patient ij, and  $\varepsilon_{tij}$  is the  
89 term that represents the random deviation of observation t within patient ij from the predicted  
90 value.

91 **Level 2 model.** The patient level models specify the relationship between the patient-level  
92 coefficients and the coefficients in the Level 1 model. Fixed patient-level clinical and  
93 sociodemographic covariates ( $X_{ij}$ ) will be included at this level.

$$94 \pi_{tij} = \beta_{i0j} + \Sigma \beta_{tpj}(X_{ij}) + r_{tij}$$

95 where  $\beta_{00j}$  represents the initial status of patient i within practice j,  $\beta_{10j}$  represents the linear  
96 growth rate for patient ij and  $r_{tij}$  is a patient-level random effect.

97 **Level 3 model.** The practice level models specify the relationship between the practice-level  
98 predictors and the coefficients in the Level 2 model. TRANSLATE will be coded 1 for facilitated  
99 practices and 0 for CDS only practices.

$$100 \beta_{00j} = \gamma_{000} + \gamma_{010}(\text{TRANSLATE}) + u_{00j}$$

$$101 \beta_{10j} = \gamma_{100} + \gamma_{110}(\text{TRANSLATE})$$

102 where  $\gamma_{000}$  is the intercept in the practice level model for  $\beta_{00j}$  (i.e. mean initial status for  
103 usual care practices, adjusted for individual level covariates);  $\gamma_{010}$  represents the mean  
104 difference at baseline between usual care and facilitated practices;  $\gamma_{100}$  is the linear growth rate  
105 for usual care practices,  $\gamma_{110}$  is the *difference* in linear growth rate for usual care vs facilitated  
106 practices. The u's are practice-specific random effects that represent the deviation of practice j's  
107 coefficient from its predicted value and are independent of  $r_{tij}$  and assumed to have a bivariate  
108 normal distribution over practices. Thus, the primary hypotheses of intervention effectiveness on  
109 guideline concordance can be tested as  $H_0: \gamma_{110}=0$ . Other hypotheses of interest can be tested  
110 using a priori specified linear contrasts.

111  
112 **Specific Aim 2: Conduct an intent-to-treat analysis between the CDS practices with facilitation**  
113 **versus the CDS only practices of the clinical outcomes of CDK progression and all-cause**  
114 **mortality.**

115  
116 **Hypothesis 2.1: Patients with stage 3 and 4 CKD in facilitated practices will have slower**  
117 **CKD progression than patients in CDS only practices.**

118  
119 The outcome for this analysis will be eGFR measurements over time. There will be multiple  
120 eGFR measures per patient over the duration of the study. We will use general linear mixed-  
121 effects models to estimate the rate of decline in eGFR and the degree to which the baseline  
122 covariates predict eGFR. Time for each observation will be coded as days since baseline,  
123 converted to months to aid interpretability. The statistical model will be the same as described  
124 above for hypothesis 1.1. The primary hypothesis of difference in slope between treatment  
125 groups will be tested as  $H_0: \gamma_{110}=0$ .

126  
127 **Hypothesis 2.2: Patients with stage 3 and 4 CKD in facilitated practices will have**  
128 **significantly lower all-cause mortality than stage 3 and 4 patients in CDS only practices.**

129  
130 All-cause mortality will be confirmed using the National Death Index to determine the exact date  
131 of death. The outcome for the analysis will be time from baseline to death. Patients who are  
132 alive at the end of the study period will be censored at the end of the follow-up time.  
133 Assumptions of the proportional hazards model will be checked for each variable. Covariates  
134 will include baseline eGFR, defined as the mean of the last two eGFRs prior to study entry, as  
135 well as sociodemographic and clinical characteristics. The Cox models will be adjusted for

136 clustering of patients within practice. To assess discrimination, we will calculate the *c*-statistic  
137 from the Cox regression models using methods described previously.<sup>63,64</sup> The *c*-statistic is  
138 equivalent to the probability that the predicted risk is higher for a case than a non-case and has  
139 a maximum value of 1.  
140  
141  
142

**Institutional Review Board**

**Application for Review of Research Involving Human Subjects**

**General Information – Administrative Data**

1.0

Note: Investigators and all other key personnel involved in this project must complete the Collaborative Institutional Training Initiative (CITI) Computer Based Training Course through the University of Miami. <https://www.citiprogram.org/>

**Application Type (select one)**

- New Study
- Request for Exemption, please indicate category: \_\_\_\_\_
- Amendment to Existing Approved Protocol. If requesting an amendment, please make changes to the currently approved IRB protocol using track changes. Please submit the currently approved protocol with an updated signature under the Investigator's Assurance, at the end of this form, to the IRB.
- Continuation. Please use your currently approved protocol and complete **Appendix A** found at the end of the application. Do not submit Appendix A only.

**Protocol Title**

Please enter the title of your protocol. If you are submitting multiple grants (funding sources) for this protocol please choose a generic title that represents all of the funding sources. Each individual grant will be listed in the approval letter.  
Improving Evidence-Based Primary Care for Chronic Kidney Disease

**Duration of Study**

Expected Project Start Date    March 1, 2012 for practice recruitment  
Expected Project End Date        June 30, 2017

**Principal Investigator**

Name                                    Jennifer K. Carroll  
Title/Appointment                  AAFP NRN Director  
Degree                                    MD, MPH  
Office Address                        \_\_\_\_\_  
School/Department/Organization   \_\_\_\_\_  
Primary Phone                        \_\_\_\_\_  
E-mail Address                        \_\_\_\_\_

**Co-Investigator**

**Name**                                    Kim S. Kimminau  
Title/Appointment                  Research Director of the AAFP NRN  
Degree                                    PhD  
Office Address                        \_\_\_\_\_  
School/Department/Organization   \_\_\_\_\_  
Primary Phone                        \_\_\_\_\_  
E-mail Address                        \_\_\_\_\_

**Co-Investigator**

Name                                    Miriam Dickinson  
Title/Appointment                  Biostatistician  
Degree                                    PhD  
Office Address                        \_\_\_\_\_  
School/Department/Organization   \_\_\_\_\_  
Primary Phone                        \_\_\_\_\_  
E-mail Address                        \_\_\_\_\_

**Other Study Staff**

|                                |                             |
|--------------------------------|-----------------------------|
| Name                           | Brian Manning               |
| Title/Appointment              | Associate Research Director |
| Degree                         | MPH, CHES                   |
| Office Address                 |                             |
| School/Department/Organization |                             |
| Primary Phone                  |                             |
| E-mail Address                 |                             |

**Other Study Staff**

|                                |  |
|--------------------------------|--|
| Name                           |  |
| Title/Appointment              |  |
| Degree                         |  |
| Office Address                 |  |
| School/Department/Organization |  |
| Primary Phone                  |  |
| E-mail Address                 |  |

**Other Study Staff**

|                                |  |
|--------------------------------|--|
| Name                           |  |
| Title/Appointment              |  |
| Degree                         |  |
| Office Address                 |  |
| School/Department/Organization |  |
| Primary Phone                  |  |
| E-mail Address                 |  |

**Other Study Staff**

|                                |                      |
|--------------------------------|----------------------|
| Name                           | Gerald Pulver        |
| Title/Appointment              | Quantitative Analyst |
| Degree                         | PhD                  |
| Office Address                 |                      |
| School/Department/Organization |                      |
| Primary Phone                  |                      |
| E-mail Address                 |                      |

**Funding** 2.0

**Is this project funded?**

Yes
  No

|                                        |                                                                          |
|----------------------------------------|--------------------------------------------------------------------------|
| Name of Funding Source                 | National Institute of Diabetes and Digestive and Kidney Diseases (NIDDK) |
| Title of Grant                         | Improving Evidence-based Primary Care for Chronic Kidney Disease         |
| Type of Funding (Internal or external) | External                                                                 |

**Study Information** 3.0

**Primary Study Location**

|                  |                                                                 |
|------------------|-----------------------------------------------------------------|
| Name of Location | American Academy of Family Physicians National Research Network |
|------------------|-----------------------------------------------------------------|

Briefly describe what will happen at this site:

The AAFP NRN will participate/conduct the following activities:

- Practice recruitment, enrollment and ongoing engagement (including project-related communications, paperwork, payments, and so forth);
- Maintaining IRB compliance with the AAFP IRB;
- Practice facilitation (e.g., working with the intervention practices to implement CKD guidelines);
- Data mapping and extraction process with the clinical decision support vendor;
- Data management for the quantitative and qualitative analyses;

- Analyses, preparation, and dissemination of results.

**Is this a multi-center project?** A multi-center study is one where different PIs at different institutions are conducting the same study or aspects of the same study  
 Yes If yes, complete the following questions  No

**List all Collaborating and performance sites**

Name of Location(s) University of Buffalo, Buffalo, NY is a collaborating site. Forty-two performance sites were enrolled. Sites are listed in Appendix B.

Select all that apply:

(University of Buffalo) IRB approval provided by site. If yes, please provide a copy of the IRB approval letter/e-mail – **See Appendix C.**

Letter of cooperation or support (as appropriate)

(Performance sites) IRB Agreement (site is relying upon this IRB approval)

What will happen at this site(s)?

*Collaborating site:* The study team based at the University of Buffalo will oversee the academic mentoring component of the intervention. This site will also participate in the practice facilitation, some data management for the qualitative data and process evaluation data, and the analyses, preparation and dissemination of results.

*Performance Sites:* As part of the enrollment process, the organization of each performance site will sign a Limited Data Use Agreement with the National Research Network/DARTNet, thus allowing the clinical decision support (CDS) vendor, CINA (or Other), to do the following:

- Extract a limited data set from each participating practice’s clinical data repository,
- Aggregate the standardized data into a single database,
- Share with IRB-covered research team members.

Individuals in each performance site will also be asked to complete informed consents that allow for the practice personnel to participate in the process evaluation, including interviews, and practice surveys.

Once enrolled, the scope of activities conducted by each performance site on behalf of the study will depend on the random assignment. Performance sites in the CDS plus Facilitation arm will engage with study facilitators and academic mentors in order to implement the CKD guidelines proposed by the study protocol and supported by the CKD algorithms, feedback, and point-of-care reports provided by the CDS vendor (CINA or Other). The performance sites in the CDS-only arm will be encourage to implement the CKD guidelines and have identical CDS vendor support but they will not participate in the facilitation or mentoring process. However, they will still be asked to participate in the listed activities for the process evaluation, including the interviews, and practice surveys. The performance sites will rely on the AAFP IRB approval for coverage (through the individual investigator agreement) unless the site has its own IRB.

**In carrying out this research project will you be collecting, reviewing or receiving “Protected Health Information”?** Protected Health Information is individually identifiable health information transmitted or maintained in any form or medium, which is held by a “Covered Entity” or its business associate. A Covered Entity is a health plan, a health care clearinghouse, or a health care provider who transmits any health information in electronic form in connection with a HIPAA transaction, such as billing.

Yes If yes please provide as an attachment, information about the covered entity’s policies and procedures regarding HIPAA compliance.  No

Each organization has its own HIPAA compliance guidelines. Within these guidelines moving data as either fully de-identified data or using a limited data use agreement are approved methods for data sharing. For this project the only PHI that will be moved is dates of service. This will be done under a limited data use agreement that follows the guidelines for all organizations as long as the data use agreement has been appropriately reviewed by an IRB. No other PHI will be moved. By signing the DUA, the organization gives the research team permission to view these data and use for research analysis. **Please see the Data Use Agreement in the Appendices [\(previously submitted to IRB\)](#).**

**Summary of Proposed Research**

**4.0**

**Project Summary** Provide a brief summary of the scope of work for this project, using non-technical terms that would be

understood by a non-scientific reader. This summary should be no more than 200 words.

**This application represents the AAFP NRN's component of a larger NIDDK (NIH) grant awarded to the University of Buffalo in which the AAFP NRN is a subcontractor. The personnel at the AAFP NRN and the personnel at the University of Buffalo will work together in an integrated fashion; however, this IRB application only covers the activities and actions of the AAFP NRN research team. The personnel from the University of Colorado Denver and University of Kansas Medical Center are considered NRN personnel through existing service contracts with the AAFP NRN. The performance sites (i.e., the participating practices) for this study will be covered by the AAFP IRB, unless they are already covered under their own IRB.**

The prevalence of Chronic Kidney Disease (CKD) is steadily increasing in the United States, causing significant morbidities and mortality. There is reasonable evidence that specific actions/guidelines implemented by primary care physicians may help delay CKD progression and reduce mortality. The availability of Clinical Decision Support (CDS) for CKD may help promote effective, evidence-based care. The present study will test the extent to which CDS plus practice facilitation promotes evidence-based care and improves the clinical outcomes of CKD progression compared to using a CDS system alone. This study will endeavor to enroll up to 44 practices associated with the Distributed Ambulatory Research in Therapeutics Network (DARTNet), a federated network of organizations that use Electronic Health Records (EHR); or, practices associated with CINA, the CDS vendor for this study. Data from patients with CKD stages 3 and 4 will be included in the limited data set. The key endpoints are death, need for renal dialysis, or significant progression of CKD. Intermediary outcomes include process measures such as medication compliance and smoking cessation. The practice facilitation intervention is based on a well-studied approach for implementing Wagner's Chronic Care Model, using the acronym of TRANSLATE (Team approach, Reminder systems, Audit & feedback, Networked information systems & registries, Site coordinator (logistical/operational), Local clinician champion (academic), Administrative oversight, support & resources, Target, Education & evidence.) In a previous studies using facilitation, significant lasting improvements were observed in the clinical outcomes of patients with diabetes. We are interested if similar results will be seen using facilitation plus CDS systems in patients with CKD.

**Purpose and/or Rationale for Proposed Research** Briefly describe the purpose and background rationale for the proposed project as well as the hypotheses/research questions to be examined. Should be no more than 200 words.

**Specific Aim 1:** Conduct a group randomized comparator trial of computer decision support (CDS) plus the full TRANSLATE practice facilitation model, versus CDS alone in promoting evidence-based care in primary care practices for all patients with an eGFR <60 and > 15 ml/min/1.73m<sup>2</sup> (CKD stages 3 and 4). **Hypothesis 1.1:** CDS practices using the TRANSLATE model will provide a greater degree of evidence-based care than CDS-only practices.

**Specific Aim 2:** Conduct an intent-to-treat and process analysis between the CDS practices with facilitation versus the CDS only practices of the clinical outcomes of CDK progression and mortality.

**Hypothesis 2.1:** Patients with stage 3 and 4 CKD in facilitated practices will have slower CKD progression than patients in CDS only practices.

**Hypothesis 2.2:** Patients with stage 3 and 4 CKD in facilitated practices will have significantly lower mortality than stage 3 and 4 patients in CDS only practices.

**Hypothesis 2.3:** The process evaluation will determine through qualitative methods the fidelity of the facilitated TRANSLATE program; find the challenges and enablers of the implementation process, the role of facilitation, and the contextual factors that contribute to TRANSLATE decisions and strategies; and translate lessons learned into pragmatic "best practices" for future facilitation and dissemination.

**Methodology/Procedures** Describe sequentially and in detail, all procedures in which the research participants will be involved, e.g., paper and pencil tasks, interviews, observations, surveys, questionnaires, reviewing private records/files, physical assessments, audiotaping and/or videotaping, time requirement including number of sessions, amount of time per session, and duration or period of time over which the research will take place, etc. For school-based research where



class time is used, describe in detail the activities planned for nonparticipants and explain where both participants and non-participants will be located during the research activities. Include a concise description of procedures, locations, time commitments, and alternate activities on the relevant consent and assent forms.

**Practice-level data**

*Informed Consent:*

Across both arms, all practices will need to present a Physician Champion and Study Coordinator who are willing to complete informed consents on behalf of the practices and complete the paperwork to serve as individual investigators for this project (unless covered by their own IRB). The project manager, research assistant, academic mentors, facilitators, and qualitative analysts will all interact with these two key practice members, and communications with these individuals will be considered part of the process evaluation data. NOTE: The comparator practices will not have contact with the facilitators and academic mentors. In later stages of the project involving interviews with other practice members, an abbreviated informed consent will be used. **Please see copies of the informed consents in the Appendices (previously submitted to IRB).**

*Baseline Survey Assessment:*

Across both arms (CDS-only and CDS plus Facilitation), members in each practice will be asked to complete a validated Clinician Staff Questionnaire short-form (CSQ), parts of the Office Vital Signs Survey (OVSS), and a brief survey regarding the practices’ use of CINA (Other CDS). The burden time for this task is estimated at 5-10 minutes and completion of the surveys is completely voluntary on the part of each practice member. Survey respondents will be asked not to put any personal identifiers on the confidential surveys and each will be given an individual, self-addressed stamped envelope in which to return the surveys directly to the NRN offices. Consent is implied within the act of completing the survey. **Please see copies of the baseline surveys in the Appendices (previously submitted to IRB).**

*Ongoing Assessment as part of Quality Improvement:*

All practices will be asked to set CKD treatment targets and regularly review performance data to track progress. The intervention practices will be asked to facilitate practice innovations that improve the efficiency of CKD treatment and management; liaise with academic mentors and practice facilitators via videoconferencing and possibly face to face; and convene a regular quality-improvement team meeting to disseminate best-practice guidelines and share success strategies. Comparator practices will be given information (such as nationally-published guidelines) at baseline and encouraged to meet with practice teams as part of overall QI, using the same strategies as the intervention practices; however, they will not receive ongoing assistance. Telephonic and electronic communication between practice facilitators and the sites will be collected/recorded to assess effectiveness of the facilitation program. To collect these data, practices will be notified in the informed consent and practice participation agreement that the facilitator will track all communication (phone, electronic, in person) and that this information will be considered confidential data by the research team. **Please see draft copies of the interviews in the Appendices (previously submitted to IRB).**

**Patient-level data:** The data set that is extracted by the CDS vendor (CINA or Other) and transferred to the research team will be a limited data set with no PHI except for dates of services associated with the variables described below. The limited data set extracted from practice EHRs will include the following, **as outlined by the Data Use Agreement (DUA) and DUA Amendment #1, which can be found in the Appendices.**

| Limited Data Set for Patient-Level Data |                                 |
|-----------------------------------------|---------------------------------|
| Year of Birth                           | Numerical                       |
| Gender                                  | M/F                             |
| Race/Ethnicity                          | Standard major groups and Other |
| Current smoking                         | Current, never, past            |
| Height and Weight/BMI                   | Hgt, wgt actual                 |
| Total visits/encounters                 | Encounter records               |
| Hemoglobin                              | Numerical result                |
| HDL                                     | Numerical result                |
| LDL-C                                   | Numerical result                |
| Triglycerides                           | Numerical result                |
| Creatinine                              | Numerical result                |
| AST                                     | Numerical result                |
| ALT                                     | Numerical result                |

|                                   |                                   |
|-----------------------------------|-----------------------------------|
| HbA1c                             | Numerical result                  |
| 25 OH Vitamin D                   | Numerical result                  |
| Electrolytes                      | Numerical result                  |
| Serum Phosphorous                 | Numerical result                  |
| PTH intact                        | Numerical result                  |
| All meds                          | Coded (NDC)/RxNorm                |
| All diagnosis – Active & Inactive | ICD-9                             |
| Blood pressure                    | Systolic and diastolic            |
| Estimated GFR                     | Calculated value                  |
| Urine albumin/creatinine ration   | Calculated value                  |
| Medicare Insurance Coverage       | Flag for Medicare insurance       |
| Nephrologists referrals           | Referral records (when available) |

Race and ethnicity may be available in the EHR as some practices collect this data, where these data are not available it will be imputed using validated algorithms from RAND Corporation.

**Measures** List all questionnaires, surveys, interviews, psychological measures, or other measures, that participants will be asked to complete. Submit labeled copies as an attachment to the application and indicate that the instrument is in the public domain or provide appropriate documentation of permission to use each scale.

**The data to be obtained from the practice will include:**

1. *Baseline survey set* – includes short-form Clinician Staff Questionnaire (validated survey in public domain), parts of the Office Vital Signs Survey (survey created by this research team currently undergoing validation process), and a short set of questions regarding the use of the clinical decision support system (questions developed by research team). All instruments can be found in the Appendices.
2. *Semi-structured or depth interviews* with physician champions, study coordinators, and possibly other key practice members at each practice; to be collected during ongoing phone interviews. Draft interview templates can be found in the appendices.
3. *Review of communication* between 1) practice and facilitator and 2) practice and academic mentor, and 3) practice and qualitative analyst (outside of schedule interviews). These communications may occur through the following methods: email, phone, conference calls, webinars,. Facilitators will be asked to log their communications with the practices. While it is possible communications between the project manager/assistant and practices are reviewed, it is less likely these communications will contribute to the process evaluation.
4. Review and analysis of minutes and notes from practice QI team meetings (either documented by practice member or facilitator).

**The patient measures for the study will include:**

The data set that is extracted by the CDS vendor (CINA or Other) and transferred to the research team will be a limited data set with no PHI except for dates of services associated with the variables described below. The limited data set extracted from practice EHRs is described in the Methodology/Procedures section.

**Participants Involved in the Research Study**

**5.0**

**Participation Population** (select all that apply) If you select any on the list, please complete the Justification question below. If you select N/A from the list below, you do not need to complete the Justification question.

|                                     |                                                                                                    |                                     |                                                  |
|-------------------------------------|----------------------------------------------------------------------------------------------------|-------------------------------------|--------------------------------------------------|
| <input type="checkbox"/>            | Prisoners                                                                                          | <input checked="" type="checkbox"/> | Minors (Under Age 18) (Indicate Age Range)       |
| <input type="checkbox"/>            | Institutionalized Residents                                                                        | <input checked="" type="checkbox"/> | Physically or Mentally Challenged                |
| <input checked="" type="checkbox"/> | Legally Incompetent                                                                                | <input checked="" type="checkbox"/> | Employees or Subordinates of Investigators       |
| <input checked="" type="checkbox"/> | Illiterate Participants                                                                            | <input checked="" type="checkbox"/> | Public Officials or Candidates for Public Office |
| <input checked="" type="checkbox"/> | Employees/Agency Staff                                                                             | <input checked="" type="checkbox"/> | Pregnant Women                                   |
| <input type="checkbox"/>            | N/A (Participating Population is not identified as a vulnerable populations under the regulations) |                                     |                                                  |

**Justification**

Please provide justification for using minors or vulnerable populations selected above.

This study is looking at a limited data set of all patients with a diagnosis of CKD. While unlikely, it is possible that the data set may incidentally include limited clinical data on patients who are part of these vulnerable populations. However, they are not being targeted for inclusion and we will not be able to identify any individuals whose data are included.

**Number of Subjects**

Please provide the anticipated number of subjects to be enrolled.

Practice-level data: In order for a practice to enroll, a lead physician and a site coordinator must sign an informed consent. With up to 44 practices, that is a minimum of **88 practice members** participating in the study evaluation. Participation by the rest of the practice members is voluntary. Each practice member will be asked to complete a baseline survey set, described in the Methodology section, of which completion will imply informed consent; and some members will be asked to participate in the interview process, of which brief informed consent will be obtained at the time. The exact number beyond the 88 original practice participants cannot be determined at this time since their participation will be voluntary.

Patient-level data: We anticipate that each of the participating practices will have average patient panels of approximately 5,500 patients with an average percentage of patients with Stage 3 or 4 CKD of 11 to 13%, resulting in approximately 605 to 715 eligible patients per practice who meet the inclusion criteria. This will result in a total patient sample of approximately 31,000 patients at baseline, with additional patients added over the course of the study. There are no limitations based on gender, race or ethnicity. At the inception of the study we will use data from the preceding 48 months to determine eligible patients with additional patients added to the analytical dataset as they meet study criteria after inception. All patient-level data are converted into a limited data set as part of the data extraction process.

**Recruitment Process** Specifically describe the step-by-step procedures for finding and recruiting research participants or requesting pre-existing data or materials. Name any specific agencies or institutions that will provide access. Identify who will contact prospective participants. Describe solicitation through the use of advertising posters, flyers, announcements, newspaper, radio television or internet, face-to-face interactions such as direct mail or phone contact, classrooms, subject pools, health care registries, and institutional “gatekeepers” as applicable. Attach a copy of any recruitment materials including: poster(s) advertisement(s) or letter(s) or solicitation scripts to be used for recruitment.

Recruitment of Study Patients: We will not recruit individual patients. The limited data set of the eligible patients in each practice will comprise the study patient panel.

Recruitment of Study Practices: For the trial we will recruit up to 44 practices already using CINA. Or Other CDS We will recruit practices in 3 stages:

- *Stage 1:* Email outreach for general interest only, followed up by postcard mailing to healthcare organizations already using CINA or Other CDS. This stage will help ascertain broad interest in the study and generate general awareness at the organizational level.
- *Stage 2:* Descriptive letter but no enrollment materials will be mailed to organizations that expressed an interest from stage 1. The goal of ascertaining early interest and generating awareness is to help organizations plan ahead in their quality improvement projects and annual QI plans, since the organization often plans the activities for the practices.
- *Stage 3:* Once IRB approval has been granted, formal practice recruitment will occur. An enrollment letter will be sent to practices that belong to organizations that expressed a previous interest. A webinar or phone conference will be arranged to review enrollment materials. Once all materials are reviewed and all questions answered, the practice will be allowed to formally enroll.

NOTE: We anticipate great interest in this study and therefore more than 44 practices may express interest and wish to enroll. The practices selected for the study will be randomly selected from among eligible practices that agree to participate. The remaining practices will be put on the wait list. All payment issues will be fully explained to all practices during stage 3, including the fact that practices on the wait list will not be compensated unless they officially join the study at some point.

**Will participants receive compensation for participation?**

Yes  No

If yes, please provide details including the form of remuneration including dollar amount, course credit, lottery, gift certificate. Explain the remuneration plan, including whether and how pro-ration will be made for partial participation. For lotteries include the number of prizes, nature and value of each prize. Include information about compensation on the

relevant consent and or assent forms. Please refer to “The Consent Process” guidance for more information.

This is a practice-level intervention; therefore the practices will be compensated as follows:

Comparator practices: payment of \$250 per practice in Year 1, \$750 per practice in each year for Years 2, 3, and 4 for a **total of \$2,500 per practice** ( $\$750 \times 3 \text{ yrs} = \$2250 + \$250 = \$2500$ )

Intervention practices: payment of \$500 per practice in Year 1, \$1,000 per practice in each year for Years 2, 3, and 4 for a **total of \$3,500 per practice** ( $\$1000 \times 3 \text{ years} + \$500 = \$3500$ )

Wait-List practices: Practices that enroll but are not selected for randomization will be put on the waiting list. There is no compensation for being on the waiting list, but if selected for participation, the practice will receive the due compensation as the practice it is replacing, starting with the date of replacement.

## Risk/Benefit

6.0

**Potential Benefits from the Study** Discuss any potential direct benefits to participants from their involvement in the project and/or the potential benefits to society that would justify involvement of participants in this study.

Benefits to Patients: Patients may experience a higher level of guideline concordant care for their CKD through the practice participation in this study.

Benefits to Practices and Practice Personnel: Practices and staff will better understand how they deliver care for patients with stage 3 or 4 CKD. Moreover, they also will learn how the potential enhancements in the care of these patients can be both attained and sustained over time. They will learn the potential barriers and facilitators for the delivery of quality care to patients with CKD and how to take advantage of the facilitators and ways to successfully address the barriers.

Benefits to Public Health: Completion of this research is expected to determine the value of facilitation in promoting evidence-based care for chronic kidney disease. It will also help determine the impact of greater guideline concordance on the rate of progression of CKD and explore the impact of several individual intermediate outcomes on the rate of progression of CKD. Ultimately, findings of the study will promote improved primary care for CKD.

**Potential Risks from the Study** Discuss the known and anticipated risks, if any, of the proposed research. Specify the particular risks(s) associated with each procedure or test. Consider both physical and psychological/emotional risks. Describe the procedures or safeguards in place to protect the physical and psychological health of the participants. e.g., referral to psychological counseling resources.

We do not foresee any major risks to patients as the goal of this study is to increase the use of evidence-based approaches to clinical care and all clinical decisions are in the control of the treating clinician and patient. Potential risk to patients is from loss of confidential data. Quantitative data will be aggregated at the entire data set level for all public presentations and the researchers will enter into limited data use agreements with each covered entity that contributes data to the study. This ensures no attempt will be made to identify or contact subjects. Risks to practice personnel may include:

Time and competing demands: The physician champion and/or site coordinator may experience some stress related to the competing demands of completing the research obligations and the normal course of clinical/administrative operations for patient care. Research project staff will be in contact with the practices on a periodic basis (typically weekly or bi-weekly) via phone and email; issues such as these (study burden, competing demands, and study responsibilities) will be addressed with the objective of decreasing any study-related burdens.

Knowledge of practice healthcare delivery: The site coordinator and physician champion - as well as other practice personnel -- may learn by their participation in the study that the quality of healthcare provided to their patients with stage 3 or 4 CKD does not meet the quality of care they previously thought they were delivering. This knowledge may result in disappointment, disbelief, discomfort, and/or feelings of failure. To the extent that a given practice's reported data does not meet practice expectations, physician champions and study coordinators will be encouraged to discuss these issues with either Drs. Chet Fox or Joe Vassalotti, or the project facilitators as recommended by Drs. Fox and Vassotti.

Identifying practice clinicians & their healthcare delivery patterns:

Most data and provider reports will be aggregated at the practice-level and will not contain information on individual provider performance. However, in some cases, providers may request an individual provider report, as this information is helpful to providers in evaluating their own performance. This is a common request as a part of Quality Improvement activities within a practice. In the event such reports are requested, the PI will review the reports prior to distributing them to the providers. If there are any concerns over the information, the reports will be discussed privately with the providers in question. Any and all reports identifying practices by name and or individual provider will be solely for internal use among the study team and participating practices, for the purposes of the intervention. All external reports will be aggregated and anonymous and will not identify individual providers or practices by name. All providers asking for individual reports will sign a new consent that contains the information concerning risks and benefits of these reports.

43

**Consent**

**7.0**

44

**Consent Process** Describe when, where, from whom, by whom, and how often, voluntary informed consent will be obtained.

Informed Consent of Study Patients: No individual patient consent will be obtained since the intervention occurs at the practice level rather than at the patient level. All patient data will be viewed by the study team in a limited data set format.

Recruitment of Study Practices: For the trial we will recruit up to 44 practices using CINA or other CDS vendor. All recruitment will be by direct contact between study team personnel and decision-making personnel within each practice/organizations. Representatives from participating practices will be asked to sign two documents indicating consent:

- Practice Agreement: This “letter of agreement” outlines the expectations of the practice and its clinicians/staff and the expectations of the quality improvement team and the research team. While not a formal consent process and not a binding contract, this letter of agreement serves to clarify expectations for all parties involved. Practices will be randomly selected from among all eligible practices that sign this form.
- Informed Consent – Key Personnel: The Physician Champion and the Study Coordinator will be asked to complete an informed consent. Consent from both personnel is required to participate in the study.
- Informed Consent – Voluntary Personnel: All practice clinicians and staff will be asked to complete a confidential baseline survey (CSQ/OVS); completion is optional and implies consent. Throughout the study, study team staff and/or facilitators may conduct telephone interviews. At that time, practice staff that agrees to be interviewed will be asked to complete a brief Informed Consent or verbally give permission. Verbal permission will be audio-taped.

45

**Waiver / Alteration of Informed Consent**

Are you requesting a waiver or alteration of Informed Consent?  Yes  No

If you are requesting a waiver or alteration describe: (1) how the proposed research presents no more than minimal risk to participants, (2) why a waiver or alteration of informed consent will not adversely affect the rights and welfare of participants, (3) why it is impracticable to carry out the research without a waiver or alteration of informed consent. Also describe how pertinent information will be provided to participants, if appropriate, at a later date. Describe how you will otherwise fully inform participants, i.e., use of an information script, information letter, etc.

A waiver of informed consent is requested for patients, but not for clinicians / staff within the practice. Clinicians and staff will be consented, but it is not necessary or practical to consent patients whose limited data will be included in the aggregated data. Risk to patients is minimal as the research team is only able to obtain aggregated, limited data subject to the Limited Data Use Agreement. Data from health records is routinely extracted for quality improvement, financial and other purposes - and no consent is required. The data for this study will extend back four years from the start of the study, thus it is not possible to contact all the individuals who may be included in the aggregated data.

46

**Research involving minors, or others who are not competent to give legally valid consent.**

If you are involving minors, or others who are not competent to give legally valid consent, please explain how the subject’s understanding will be assessed and how often. Include the questions that will be asked or actions that will be taken to assess understanding. Describe the process to be used to obtain permission of parent or guardian. Attach a copy of an information-permission letter to be used. **If you are not involving minors, or others who are not competent to give legally valid consent, you do not need to complete this question.**

Minors may be incidentally included in the limited data set, but we are requesting a waiver of informed consent.

47

**Assent**

if you are involving people who are not legally competent to give consent but are reasonably competent to decide whether to participate or not, describe the procedure you would use to gain assent and attach the form. Children must assent (or, voluntarily agree) to participate and a parent must separately provide permission on behalf of his/her child. Two separate forms are required. Children under age 7 may assent either orally or passively, depending on their level of maturity. **If you are not involving needing to assent anyone in your study, you do not need to complete this question.**

N/A

48

**Will you be obtaining consent/assent from non-English speaking participants:**

Yes  No

If yes, describe the process that will be used to translate documents, the language and qualifications of the translator.

49  
50

**Privacy and Confidentiality**

**8.0**

**Describe the procedures to be used to ensure the privacy of participation and data obtained.**

Privacy is required unless subjects give express, written permission to have their identifiable information published, presented, or shared. Explain who will have access to raw data, whether raw data will be made available to anyone other than the Principal Investigator and immediate study personnel (e.g., school officials, medical personnel, federal agencies etc.) If yes, who, how and why? Describe the procedure for sharing data. Describe how the research participant will be informed that the data may be shared. Describe any circumstances under which you might be required to break confidentiality. Explain how you will inform potential subjects that confidentiality may be broken.

Collection of Data: All patient data will be collected from participating practices by CDS vendor (CINA or Other) as a limited data set or matched to the National Death Registry using standard operating procedures for DARTNet and CDS vendor. DARTNet is the electronic network associated with the AAFP NRN. Data from multiple sources within the EHR are initially stored in the CDS vendor Clinical Data Repository (CDR) for clinical care. Relevant study data are standardized within the CDS vendor CDR across all DARTNet sites and then aggregated into one large study database with dates of birth transformed to year of birth. All years of birth prior to 89 years ago will be converted to a single category.

Access to Data: Identified patient-level data will never be in the possession of the research team. After appropriate IRB approvals and data use agreements are obtained, the limited patient level data will be transferred to the investigators via secure FTP (File Transfer Protocol) from CDS vendor to a secure, DARTNet, research server maintained by the University of Colorado Denver for DARTNet studies. Research access to this server is closely monitored and limited to appropriate research team members.

Protection of Patient Data: Patient level limited data can only be extracted from each practice CDR on the positive action/approval of a designated individual within each practice. Direct identifiers never leave the practice. The limited data, once extracted, are transferred using secure FTP. Data forwarded to the research team will be housed on a secure research server at the University of Colorado Denver (UCD). UCD provides academic support to the AAFP NRN through a service contract that includes part time staff (including Drs. Pace, Dickinson and Pulver) as well as informatics support. Study data will be housed on research specific servers that are not only behind the UCD fire wall, but visible only to select IP (Internet Provider) groups within the overall UCD network. In addition, these data are stored on directories with limited user access. Data servers are managed by the UCD Department of Family Medicine, which includes a locked, environmentally controlled, 24-hour monitored server farm with redundant backup systems. Analysis will be performed on UCD SAS servers maintained by the campus information services, located on core or local workstations maintained by the Department of Family Medicine. No data will be stored on local workstations. The SAS servers are specifically maintained for secure analysis of health care data.

Protection of Practice-Level Data: *Because practice-level data is being used in a formative evaluation, it is necessary to retain the linkages between the practice and the data in order to provide information to the facilitators and academic mentors to guide the intervention. Practice-level data will only be shared internally within the research team.*

In all reports that are disseminated externally, there will be no link between the research data and identifiable participant information; all data will be completely de-identified with regard to provider and practice name. The study subjects in this proposal are the provider participants. All research team members will comply with federal regulations to ensure that confidentiality is maintained. There will be no reference by name of any provider participant (or their patients) in any external qualitative data report. All study records will be encoded with a unique participant number (UPN).

51  
52

**Data**

**9.0**

**Check if any of the following will be used in Data Collection:**

- |                                     |              |                                     |               |
|-------------------------------------|--------------|-------------------------------------|---------------|
| <input checked="" type="checkbox"/> | Audio Tapes  | <input checked="" type="checkbox"/> | Video Tapes   |
| <input checked="" type="checkbox"/> | Still Photos | <input type="checkbox"/>            | Other Imaging |

None

It is standard practice to audiotape interviews over the phone in order to preserve the fidelity of the interaction and also document the participant's verbal informed consent. Interviews will only be recorded with permission of the interviewee. It is also typical to capture photos of the practice and/or personnel. Any personnel in photos will be asked to complete a photo release form in the case that a photo is later shared in a presentation, etc. Finally, since much of the facilitation efforts will be done virtually, it is possible that practices may send video of themselves doing a group exercise for the facilitator to review. Such videos could be considered part of the process evaluation.

53

Other (please explain)

**Explain how the data will be kept confidential, stored, and disposed** If anonymous data collection is proposed, provide details of how investigators will not have the ability to trace responses to research participants identities. For multiphase data collection or if multiple contacts will be made with research participants, specifically explain the tracking and coding systems that will be used. Address the confidentiality of data collected via e-mail, databases, Web interfaces, computer servers and other networked information, as applicable.

Patient-level data: There will be no contact between the research team and the patients whose limited data appears in the data set. When CDS vendor extracts and aggregates the patient level data, each patient record will be assigned a new, randomly generated GUID (Globally Unique Identifier) for this research project. Only members of the research team will have access to the organization and practice level codes. Only the local organization/practice and CDS vendor will have access to identifiable patient level data and this information will never leave the individual organizations/practices nor can any identified data be returned or even viewed by the research team even as it resides within the organization. The limited data set of research data will be stored on a secure server at the University of Colorado Denver. In publications and presentations, all data will be reported in aggregate and no individual will be identified.

Practice-level data: Practice-level data regarding clinical and personnel operations will be part of the overall qualitative and process evaluation. Depth interviews and semi-structured interviews from study coordinators, physician champions and other practice personnel will be collected during phone interviews. In addition, facilitators will document and retain a record of all communications with the practice, including phone, electronic, person, and through webinar or webcast. These data will be stored on a password-protected server, only available to the internal study group. The server is behind firewalls at UCD.

Qualitative data will be transmitted among study team members using secure email, a secure Survey Monkey account and / or upload and download via the secure server at UCD. Qualitative data comes from pre-existing emails and online web conferences between practice facilitators, academic mentors and practice staff, and therefore emailing this information among study team members does not increase the risk to study participants. Additionally, the information contained in this data is not sensitive or confidential in nature and consists mainly of communication regarding scheduling and organizing the facilitation, and general notes on high-level practice activities that do not identify individual providers' practice patterns. Practice personnel have consented to have their communications shared as part of the study data. No practice-level data will be identified outside of the internal study group unless explicit permission is granted by the practice in a voluntary effort; e.g., a high-performing practice might choose to share their "best practices" with others in the spirit of collaborative learning.

54

**Deception 10.0**

55

**Will participants be deceived or be incompletely informed regarding any aspect of this study?**

Yes  No

If your response is "yes", describe the type of deception you will use, indicate why it is necessary for this study, and provide a copy of the debriefing script you will use with research participants explaining when and how it will be used.

56

**Financial Disclosure 11.0**

57

**Could the results of the study provide a potential financial gain to you, a member of your family, or any of the co-investigators that may give the appearance of a potential conflict of interest?**

Yes  No

If yes and the financial interest will exceed \$5,000 in a year, a financial disclosure statement is required with the application. Please contact the IRB for a copy of the financial disclosure form.

58

**Investigator's Assurance 12.0**

I understand that as Principal Investigator, I have ultimate responsibility for the protection of the rights and welfare of human subjects and the ethical conduct of this research protocol. I agree to comply with all IRB and Institutional policies and procedures, as well as with all applicable federal, state, and local laws regarding the protection of human subjects in research, including but not limited to:

- Ensure that the project will be performed by qualified personnel according to the research protocol;
- Maintain a copy of all questionnaires, survey instruments, interview questions, data collection instruments, and information sheets for human subjects for at least three years following termination of the project except identifying links.

I have read and understand the above policy concerning IRB exempt protocols.

Signature of Principal Investigator



Date

December 05, 2017

59  
60



**Appendix A - Continuation**

Complete Appendix A if you are requesting a continuation to a currently approved protocol. If you wish to amend the protocol as well, please make changes to the already approved protocol by using “Track Changes”. Submit both the amended protocol and Appendix A to the IRB, via e-mail, at the same time. If there are no changes to the project, please submit the currently approved protocol with an updated signature under the Investigator Assurance and Appendix A, to the IRB, at the same time.)

**Status of the project**

|                          |                                      |                                     |                                       |
|--------------------------|--------------------------------------|-------------------------------------|---------------------------------------|
| <input type="checkbox"/> | Study has not begun                  | <input type="checkbox"/>            | Subjects still being recruited        |
| <input type="checkbox"/> | Subjects still being followed        | <input checked="" type="checkbox"/> | Data analysis only                    |
| <input type="checkbox"/> | Project Closeout: Data de-identified | <input type="checkbox"/>            | Project Closeout: Link file destroyed |

**Clinician Participants\***

Complete the chart below with the numbers participants *enrolled in the study to date*: (If this study collects racial, ethnic or gender identification please include it below. If not, complete “Totals” column only.)

| Gender        | Ethnicity |                               |                    |                               |       |           | Total     |
|---------------|-----------|-------------------------------|--------------------|-------------------------------|-------|-----------|-----------|
|               | Asian     | Black, not of Hispanic Origin | Hispanic or Latino | White, not of Hispanic Origin | Other | Unknown   |           |
| Male          |           |                               |                    |                               |       |           |           |
| Female        |           |                               |                    |                               |       |           |           |
| Unknown       |           |                               |                    |                               |       | 50        | 50        |
| <b>Totals</b> |           |                               |                    |                               |       | <b>50</b> | <b>50</b> |

**Number of patients with baseline data**

Complete the chart below with the numbers participants *enrolled in the study to date*: (If this study collects racial, ethnic or gender identification please include it below. If not, complete “Totals” column only.)

| Racial Categories                         | Ethnic Categories      |             |                      |                    |            |                      |                                |             |                      | Total        |
|-------------------------------------------|------------------------|-------------|----------------------|--------------------|------------|----------------------|--------------------------------|-------------|----------------------|--------------|
|                                           | Not Hispanic or Latino |             |                      | Hispanic or Latino |            |                      | Unknown/Not Reported Ethnicity |             |                      |              |
|                                           | Female                 | Male        | Unknown/Not Reported | Female             | Male       | Unknown/Not Reported | Female                         | Male        | Unknown/Not Reported |              |
| American Indian/Alaska Native             | 26                     | 8           | 0                    | 95                 | 58         | 0                    | 1                              | 3           | 0                    | 191          |
| Asian                                     | 189                    | 109         | 0                    | 2                  | 0          | 0                    | 4                              | 6           | 0                    | 310          |
| Native Hawaiian or Other Pacific Islander | 6                      | 6           | 0                    | 0                  | 1          | 0                    | 1                              | 0           | 0                    | 14           |
| Black or African American                 | 1663                   | 776         | 0                    | 367                | 121        | 0                    | 117                            | 57          | 0                    | 3101         |
| White                                     | 8153                   | 4120        | 0                    | 267                | 133        | 0                    | 490                            | 261         | 0                    | 13424        |
| More than One Race                        | 0                      | 0           | 0                    | 0                  | 0          | 0                    | 0                              | 0           | 0                    | 0            |
| Unknown or Not Reported                   | 93                     | 60          | 0                    | 38                 | 18         | 0                    | 3909                           | 2467        | 0                    | 6585         |
| <b>Total</b>                              | <b>10130</b>           | <b>5079</b> | <b>0</b>             | <b>769</b>         | <b>331</b> | <b>0</b>             | <b>4522</b>                    | <b>2794</b> | <b>0</b>             | <b>23625</b> |

**Have there been any unanticipated problems or adverse events involving risks to subject or others?**

Yes (please explain)  No

73

**Have subjects withdrawn from the research?**

Yes (please explain, include number of withdrawn subjects)  No

There were no withdrawals since the last continuing review report.

74

**Have there been any complaints about the research?**

Yes (please provide a summary of any complaints)  No

75

**Has there been additional or new information about this study which may affect the risk/benefit for subjects, which may affect a subject's willingness to continue participation to be given to prior participants?**

Yes (please provide a summary)  No

76

**Provide a brief report summarizing research performed in this study since the last IRB review, including progress of the research and preliminary information about results and/or trends?**

All data collection and follow-up has concluded. Two presentations were added to the publications list (see page 16). We are currently working on the main outcomes manuscript. Analyses of two primary clinical outcomes (eGFR and systolic BP) are complete. The final patient cohort analyzed represented data from 30 practices (10 Clinical Decision Support and 20 Clinical Decision Support +Practice Facilitation). Primary measure: change in estimated glomerular filtration rate (eGFR) over time. 1) Significant difference in eGFR slopes. Control group: decline of ~0.83 per year; no decline for intervention group. Results from sensitivity analysis using propensity scores were similar. 2) No evidence supporting differential intervention effect for stage-3 vs. stage-4 patients (p=.7794) Secondary outcomes: Systolic blood pressure changes over time, nephrology referral for stage-4 CKD patients, avoidance of NSAIDs, use of ACE/ARBs, CKD diagnosis.

Comparing groups: 1) There were no significant difference in slopes for SBP change. 2) Fewer nephrology referrals, regardless of whether patient had baseline nephrology referral (31.8% vs 16%). 3) Nephrology referral likelihood significantly lower for patients not having referral at baseline (p<.0001). 4) No significant differences on rates of ACE/ARBs use, avoidance of NSAIDs, and CKD diagnosis Conclusions: Significant effect in slowing rate of progression of kidney disease in patients with stage-3 and stage-4 CKD observed despite controlling for imbalance in some baseline characteristics between the groups, and differential drop-out of control groups. No difference in secondary outcomes.

77

78

79

**Note:** When submitting this appendix with the updated protocol, please include the original copy of your consent form and any proposed consent form changes as well as any investigator brochures describing the project.

80 Appendix B. Performance Sites (Last Updated 11-16-15)  
 81  
 82  
 83

| Randomization Group                        | Organization name (w/ number of sites) | Group | Comments                                                |
|--------------------------------------------|----------------------------------------|-------|---------------------------------------------------------|
| <b>1st Randomization Pool</b>              | <b>12 organizations (18 sites)</b>     |       |                                                         |
| <i>Randomized Fall 2012</i>                |                                        | C     |                                                         |
|                                            |                                        | T     |                                                         |
|                                            |                                        | C     | Withdrew - Lack EHR capacity to participate             |
|                                            |                                        | T     |                                                         |
|                                            |                                        | T     |                                                         |
|                                            |                                        | T     |                                                         |
|                                            |                                        | T     | Withdrew - Lack EHR capacity to participate             |
|                                            |                                        | T     |                                                         |
|                                            |                                        | C     |                                                         |
|                                            |                                        | T     |                                                         |
|                                            |                                        | C     | Withdrew - Lack EHR capacity to participate             |
|                                            |                                        | C     |                                                         |
|                                            |                                        |       |                                                         |
| <b>2nd Randomization Pool</b>              |                                        |       |                                                         |
| <i>Randomized April 2013</i>               |                                        | C     |                                                         |
|                                            |                                        | T     | 1 Wilmington site withdrew because of competing demands |
|                                            |                                        | C     |                                                         |
|                                            |                                        | C     | Withdrew because of competing demands                   |
|                                            |                                        | T     |                                                         |
|                                            |                                        |       |                                                         |
| <b>3rd Randomization Pool</b>              |                                        |       |                                                         |
| <i>Randomized March 2014</i>               |                                        |       |                                                         |
|                                            |                                        | T     |                                                         |
|                                            |                                        | C     | Withdrew - Lack EHR capacity to participate             |
|                                            |                                        | T     |                                                         |
|                                            |                                        | C     | Withdrew - Lack EHR capacity to participate             |
|                                            |                                        |       |                                                         |
| <b>4th Randomization Pool</b>              |                                        |       |                                                         |
| <i>Randomized July 2014</i>                |                                        | C     |                                                         |
|                                            |                                        | T     |                                                         |
|                                            |                                        | T     |                                                         |
| <b>TOTAL Enrolled</b>                      |                                        |       |                                                         |
| <b>TOTAL Dropped (after randomization)</b> |                                        |       |                                                         |
| <b>TOTAL Active</b>                        |                                        |       |                                                         |
|                                            |                                        |       |                                                         |

84 Appendix C. List of Publications and Presentations

---

85 **2017**

86 Carroll J, Pulver G, Dickinson M, Pace W, Vassalotti J, Knox L, Manning B, Bullard E, Smail C, Fox C. TRANSLATE CKD: A  
87 Cluster Randomized Trial Comparing Two Strategies to Improve Chronic Kidney Disease Outcomes in Primary Care. Oral  
88 presentation at NAPCRG Annual Meeting, November 17-21, 2017. Montreal, Quebec.

89 **2016**

90  
91 Satchindanand N, Withiam-Leitch M, Dickinson M, Bublitz-Emsermann C, Allen GM, Yang M, Vassalotti J, Arora P,  
92 Glasgow P, Fox C. Positive Predictive Value of a Single Assessment of Estimated GFR in the Diagnosis of Chronic Kidney  
93 Disease. *Southern Medical Journal* 2016 June; 109(6): 351-5.

94  
95 **2015**

96 Pulver G, Fox CH, Pace W, Brandt E, Dickinson LM. Putting together a functional longitudinal database structure from  
97 diverse electronic medical records for use in pragmatic clinical trials. Poster presentation at 8<sup>th</sup> Annual Conference on  
98 the Science of Dissemination and Implementation, Washington, D.C., December 14-15, 2015.

99 Fox CH. The promises and pitfalls of using clinical data from disparate electronic medical records for dissemination and  
100 implementation of evidence based chronic kidney disease care - Lessons learned from the translate CKD study. Poster  
101 presentation Poster presentation at 8<sup>th</sup> Annual Conference on the Science of Dissemination and Implementation,  
102 Washington, D.C., December 14-15, 2015.

103 Fox CH, Stuart B, Bullard E, and Turmiel-Berhalter L. "Engaging Patients in Research: Methods and Lessons Learned."  
104 Workshop presentation at North American Primary Care Research Group (NAPCRG), October 24-28, 2015. Cancun,  
105 Mexico.

106 Fox CH, Birtwhistle R, and Tobin J. "Working with National Federated Databases as a Means of Facilitating and  
107 Accelerating Research." Workshop presentation at North American Primary Care Research Group (NAPCRG), October 24-  
108 28, 2015. Cancun, Mexico.

109 Cipparone CW, Withiam-Leitch M, Singh R, Kimminau K, Fox CH, Kahn LS. Accuracy of ICD-9 Codes for Early-stage Chronic  
110 Kidney Disease: A Practice-based Research Network Study. *Journal of the American Board of Family Medicine* 2015 28  
111 (5).

112 Dickinson LM, Beaty B, Fox CH, Pace W, Dickinson WP, Emsermann C, Kempe A. Pragmatic Cluster Randomized Trials  
113 Using Covariate Constrained Randomization: A Method for Practice-based Research Networks (PBRNs). *Journal of the*  
114 *American Board of Family Medicine* 2015 28 (5).

115 Kahn LS, Vest BM, Madurai N, Singh R, York TR, Cipparone CW, Reilly S, Malik KS, Fox CH. Chronic kidney disease (CKD)  
116 treatment burden among low-income primary care patients. *Chronic Illn* 2015 Sept. 11(3).

117 Vest BM, York TRM, Sand J, Fox CH, Kahn LS. Chronic Kidney Disease Guideline Implementation in Primary Care: A  
118 Qualitative Report from the TRANSLATE CKD Study. *Journal of the American Board of Family Medicine* 2015 28 (5).

119 Fox CH and Pace W. DARTNet Guided Exploration of Linkages Between Existing Health Data, Patient Reported Outcomes  
120 and PBRN Research. Webinar panel discussion for AHRQ PBRN Resource Center. August 7, 2015.

121 Neuhaus AK, Hall VM, Nguyen VT, Wisniewski AM. Virtual practice engagement in the TRANSLATE-CKD Study. Poster  
122 presentation at NAPCRG Practice-Based Research Network Conference, Bethesda, MD, June 29-30, 2015.

123 Nguyen VT, Neuhaus AK, Hall VM. Development of a Modified TRANSLATE Assessment Tool for the TRANSLATE-CKD  
124 Study. Oral presentation at NAPCRG Practice-Based Research Network Conference, Bethesda, MD, June 29-30, 2015.

125 Satchidanand N. The Positive Predictive Value of a Single Assessment of Estimated Glomerular Filtration Rate in the  
126 Prediction of Chronic Kidney Disease. Poster presentation at Translational Science Meeting, Washington, D.C., April 16-  
127 18.

128 Smail C. Comparing chronic kidney disease profiles identified using diagnostic histories and clustered clinical data with  
129 an established genetic risk model. Poster presentation at Biomedical Computation at Stanford 2015 Symposium,  
130 Stanford, CA, April 5-7, 2015.

131 **2014**

132  
133 Kahn LS, Vest BM, Cipparone C, Madurai N, York TM, Malik KS, Fox CH. Addressing patient CKD self-management in  
134 underserved primary care settings. Oral Presentation. 42nd Annual Meeting of North American Primary Care Research  
135 Group (NAPCRG), November 21-25, 2014. New York, NY.

136 Neuhaus AK, Hall VM, Nguyen VT, Ramos NP, Vest BM, Cipparone C, Sand J, Talbot B, Bullard EM, Kahn LS. “Virtual  
137 Facilitation in the TRANSLATE-CKD Study.” Poster presentation at North American Primary Care Research Group  
138 (NAPCRG), November 21-25, 2014, New York, NY.

139 Neuhaus AK, Nguyen VT, Hall VM, Ramos NP, Bullard EM. “Navigating Virtual Facilitation.” Workshop presentation at  
140 North American Primary Care Research Group (NAPCRG), November 21-25, 2014. New York, NY.

141 Nguyen V, Neuhaus K, and Hall V. An Inside Look into the World of Virtual Practice Facilitation. Oral Presentation in the  
142 Best of Innovations in PBRN Methodology Category at the North American Primary Care Research Group (NAPCRG)  
143 Practice-Based Research Network Conference. June 30 – July 1, 2014. Bethesda, MD.

144 Vest BM, Talbot B, Kahn L, Cipparone C, Sand J, and Fox C. Evaluating Virtual Practice Facilitation and Practice  
145 Transformation in a Multi-site Trial to Improve Primary Care Providers’ Recognition and Treatment of Chronic Kidney  
146 Disease (TRANSLATE CKD). Poster presented at the North American Primary Care Research Group (NAPCRG) Practice-  
147 Based Research Network Conference. June 30 – July 1, 2014. Bethesda, MD.

148 **2013**

149 Fox CH, Neuhaus K, Vassalotti JA. Importance of urine albumin–creatinine ratio in the diagnosis and prognosis of chronic  
150 kidney disease. *OA Nephrology* 2013 Nov 01;1(3):21.

151 Fox CH, Vest BM, Kahn LS, Dickinson LM, Fang H, Pace W, Kimminau K, Vassalotti J, Loskutova N, Peterson K. Improving  
152 Evidence-Based Primary Care for Chronic Kidney Disease: Study protocol for a cluster randomized control trial for  
153 translating evidence into practice (TRANSLATE CKD), (2013) *Implementation Science*, 8: 88. DOI: 10.1186/1748-5908-8-  
154 88.

155 Hunt S, Vest B, Neuhaus K, Hall V, Kimminau K, Fox C, Kahn L. “Process evaluation of a multisite translational research  
156 study to improve clinical outcomes in patients with Stage 3 and 4 chronic kidney disease (TRANSLATE CKD).” Poster

157 presentation. 41st Annual Meeting of North American Primary Care Research Group (NAPCRG). November 9-13, 2013,  
158 Ottawa, ON.

159  
160 Kahn LS, Cipparone C, Snyder M, Withiam-Leitch M, Kimminau K, Duff B, Hake J, Zaudke J, Fox C. Misclassification of  
161 patients with chronic kidney disease (CKD): exploring diagnostic coding patterns in primary care. 41<sup>st</sup> Annual Meeting of  
162 North American Primary Care Research Group (NAPCRG). November 9-13, 2013. Ottawa, ON.

163  
164 Kahn LS, Vest BM, Hunt S, Kimminau K, Neuhaus K, Fox CH. "Diagnosis and Treatment of Chronic Kidney Disease (CKD) in  
165 the Primary Care Setting: Physician's Approaches and Challenges." Poster Presentation. 41st Annual Meeting of North  
166 American Primary Care Research Group (NAPCRG). November 9-13, 2013, Ottawa, ON.

167  
168 **2012**

169 Kahn LS, Vest BM, Sessamen S, York T, Stuart B, Tumiel-Berhalter L, Fox C. "Tell Me More:" Patients' knowledge of CKD  
170 and health information preferences. 40th Annual Meeting of North American Primary Care Research Group (NAPCRG).  
171 December 1-5, 2012, New Orleans, Louisiana.

172 Smail C, Loskutova N, Pace W, Fox CH, Stewart E, Bryan C. Is The Practice Recruitment Well Running Dry? A Case Study.  
173 40th Annual Meeting of North American Primary Care Research Group (NAPCRG). December 1-5, 2012, New Orleans,  
174 Louisiana.

175 Wearner R, Hunt, S. Practices Learn the Most from Each Other: DARTNet Institute's Approach to a Learning Community.  
176 Conference on Practice Improvement (CPI). November 29-December 2, 2012, Greenville, South Carolina.

177 York T, Kahn LS, Vest B, Fox C, Sessamen S, Snyder M, Abou-Jaoude. How CKD information should be delivered to me:  
178 insights on patient understanding and preferences for CKD diagnosis. 40th Annual Meeting of North American Primary  
179 Care Research Group (NAPCRG). December 1-5, 2012, New Orleans, Louisiana.

REVISED TRANSLATE scoring tool 3-11-2015.xlsx

| TRANSLATE CKD rubric element                                                                            |                                                                           | Score    | Comments |
|---------------------------------------------------------------------------------------------------------|---------------------------------------------------------------------------|----------|----------|
| <i>1 = No activity 2 = Activity, incomplete 3 = Complete 4 = Exceeds expectation (comment required)</i> |                                                                           |          |          |
| <b>T</b>                                                                                                | <b>M0 Target measures</b>                                                 | <b>0</b> |          |
|                                                                                                         | M1 Clinician/Team selects a sub-set of study performance measures         |          |          |
|                                                                                                         | M2 Sets realistic goals for each selected measure                         |          |          |
|                                                                                                         | M3 Develops PDSAs to achieve each of the set goals                        |          |          |
|                                                                                                         | M4 Engages in iterative, performance-based target selection               |          |          |
|                                                                                                         | M5 Integrates CKD measures with other ongoing initiatives                 |          |          |
| <b>R</b>                                                                                                | <b>R0 Reminders (clinical decision support)</b>                           | <b>0</b> |          |
|                                                                                                         | R1 Practice has a functioning CDS                                         |          |          |
|                                                                                                         | R2 Practice maps workflow and defines roles to use CDS                    |          |          |
|                                                                                                         | R3 Providers use CDS with all patients                                    |          |          |
|                                                                                                         | R4 Monitors use of CDS by designated staff                                |          |          |
|                                                                                                         | R5 Develops capability to create POC alerts                               |          |          |
| <b>A</b>                                                                                                | <b>A0 Administrative Buy-in</b>                                           | <b>0</b> |          |
|                                                                                                         | A1 Perceived value by administration regarding study goals and objectives |          |          |
|                                                                                                         | A2 Commits resources necessary to accomplish study objectives             |          |          |
|                                                                                                         | A3 Attends (or delegates) regular study team meetings                     |          |          |
|                                                                                                         | A4 Complies with agreed-upon study activities/tasks                       |          |          |
|                                                                                                         | A5 Maintains continuity of study personnel and tasks over time            |          |          |
| <b>N</b>                                                                                                | <b>N0 Network Information Systems (CKD registry)</b>                      | <b>0</b> |          |
|                                                                                                         | N1 Selects a registry system (paper, electronic, middleware product)      |          |          |
|                                                                                                         | N2 Populates CKD registry                                                 |          |          |
|                                                                                                         | N3 Develops workflow to maintain and support registry function            |          |          |
|                                                                                                         | N4 Uses CKD registry for population health management                     |          |          |
|                                                                                                         | N5 Monitors use of registry by designated staff (oversight)               |          |          |
| <b>S</b>                                                                                                | <b>S0 Site coordinator</b>                                                | <b>0</b> |          |
|                                                                                                         | S1 Site coordinator identified                                            |          |          |
|                                                                                                         | S2 Site coordinator meets regularly with facilitator                      |          |          |
|                                                                                                         | S3 Site coordinator works on project outside meetings                     |          |          |
|                                                                                                         | S4 Site coordinator facilitates project within the practice               |          |          |

## REVISED TRANSLATE scoring tool 3-11-2015.xlsx

|          |              |                                                                  |          |  |
|----------|--------------|------------------------------------------------------------------|----------|--|
|          | S5           | Site coordinator meets deadlines for deliverables                |          |  |
| <b>L</b> | <b>L0</b>    | <b>Local clinician champion</b>                                  | <b>0</b> |  |
|          | L1           | Clinician champion identified                                    |          |  |
|          | L2           | Clinician champion meets regularly with study personnel          |          |  |
|          | L3           | Clinician champion is responsive to the needs of study team      |          |  |
|          | L4           | Clinician champion engages other providers regarding CKD project |          |  |
|          | L5           | Clinician champion meets deadlines for deliverables              |          |  |
| <b>A</b> | <b>F0</b>    | <b>Audit and Feedback</b>                                        | <b>0</b> |  |
|          | F1           | Regularly reviews CKD performance reports with study team        |          |  |
|          | F2           | Routinely disseminates CKD performance reports t/o practice      |          |  |
|          | F3           | Changes workflow in response to performance reporting            |          |  |
|          | F4           | Has designated staff for population health management role       |          |  |
|          | F5           | Develops capacity to create in-house performance reports         |          |  |
| <b>T</b> | <b>T0</b>    | <b>Team Approach</b>                                             | <b>0</b> |  |
|          | T1           | Routine care team meetings about individual patient care         |          |  |
|          | T2           | Working to the highest level of license (not below)              |          |  |
|          | T3           | PCMH certification status                                        |          |  |
|          | T4           | Care teams are actively engaged in study                         |          |  |
|          | T5           | Integrates CKD patient self-management support into workflows    |          |  |
| <b>E</b> | <b>E0</b>    | <b>Education</b>                                                 | <b>0</b> |  |
|          | E1           | Participates in regular CKD academic mentoring (study/other)     |          |  |
|          | E2           | Routinely uses education materials/tools provided by the study   |          |  |
|          | E3           | Engages in CKD study collaborative learning opportunities        |          |  |
|          | E4           | Incorporates CKD study into in-house training                    |          |  |
|          | E5           | Trains practice on population health management (study/other)    |          |  |
|          | <b>TOTAL</b> |                                                                  | <b>0</b> |  |
