# Supplementary material for: Effect of 2 Clinical Decision Support Strategies on Chronic Kidney Disease Outcomes in Primary Care: A Cluster Randomized Trial
Source: PubMed Central journal article supplement (PMC6324427; doi:10.1001/jamanetworkopen.2018.3377), 2018-10-26
Supplement: jamanetwopen-1-e183377-s003.pdf [file jamanetwopen-1-e183377-s003.pdf]

# Data Sharing Statement

Carroll. Effect of 2 Clinical Decision Support Strategies on Chronic Kidney Disease Outcomes in Primary Care. *JAMA Network Open*. Published October 26, 2018. 10.1001/jamanetworkopen.2018.3377

## Data

**Data available:** Yes

**Data types:** Deidentified participant data, Data dictionary, Other (please specify)

**Additional Information:** calculated values for some variables

**How to access data:** Rachel Bryan Kent, Director of Client Services, DARTNet Institute Rachel.Kent@dartnet.info www.dartnet.info

**When available:** With publication

## Supporting Documents

**Document types:** None

## Additional Information

**Who can access the data:** Researchers whose proposed use of the data has been approved.

**Types of analyses:** Any purpose that is appropriate to the data on hand.

**Mechanisms of data availability:** With a signed data access agreement and review of the proposal to be sure the data can support the question(s).

**Any additional restrictions:** Data cannot be used to attempt to re-identify any sites or patients and contact them in any manner. These data contain PHI - dates of service. The data would need to be fully de-identified prior to being supplied to other people. Funds to offset that work would be required, but we are fine with sharing once fully de-identified in a manner that works for the research question. The de-identification approach could vary depending on the research question.
